# Supplementary material for: Photographic Methods for Measuring Packaged Food and Beverage Products in Supermarkets
Source: PubMed Central journal article supplement — Curr Dev Nutr. 2017 Sep 13;1(10):e001016. doi: 10.3945/cdn.117.001016 (PMC5998779; doi:10.3945/cdn.117.001016), 2017-09-13
Supplement: cdn001016supplementarydata1.pdf [file cdn001016supplementarydata1.pdf]

| Supplemental Table 1: Food categories and subcategories |                                        | First subcategory number | First subcategory name           | Second subcategory name                                   | Second subcategory number | Numerical code |
|---------------------------------------------------------|----------------------------------------|--------------------------|----------------------------------|-----------------------------------------------------------|---------------------------|----------------|
| <b>Food group number</b>                                | <b>Food group name</b>                 |                          |                                  |                                                           |                           |                |
| 1                                                       | Beverages                              | 1                        | Fruit and vegetable juices       | Juice concentrates                                        | 1                         | 010101         |
| 2                                                       | Bread and bakery products              |                          |                                  | Frozen and non-frozen pulp                                | 2                         | 010102         |
| 3                                                       | Breakfast cereals                      |                          |                                  | Fresh juices (normal, diet, light)                        | 3                         | 010103         |
| 4                                                       | Sweets                                 |                          |                                  | Canned juices                                             | 4                         | 010104         |
| 5                                                       | Ready-to-eat foods                     |                          |                                  | 100% fruit juice (nothing more)                           | 5                         | 010105         |
| 6                                                       | Meats                                  | 2                        | Juice drinks (" <i>néctar</i> ") | Concentrated juice drinks                                 | 1                         | 010201         |
| 7                                                       | Fish and seafood                       |                          |                                  | Juice drinks (normal, diet, light)                        | 2                         | 010202         |
| 8                                                       | Dairy products                         | 3                        | Flavored beverages               | Powdered juice drink, normal, light or diet               | 1                         | 010301         |
| 9                                                       | Canned/preserved fruits and vegetables |                          |                                  | Liquid juice drink (e.g. <i>kapo</i> )                    | 2                         | 010302         |
| 10                                                      | Salsas and spreads                     |                          |                                  | Liquid tea                                                | 3                         | 010303         |
| 11                                                      | Snack foods                            | 4                        | Flavored waters                  | With sugar                                                | 1                         | 010401         |
|                                                         |                                        |                          |                                  | Without sugar                                             | 2                         | 010402         |
|                                                         |                                        | 5                        | Sports drinks                    | Isotonic beverages (liquid and powder)                    | 1                         | 010501         |
|                                                         |                                        | 6                        | Sorbet                           | Popsicles                                                 | 1                         | 010601         |
|                                                         |                                        |                          |                                  | Carton                                                    | 2                         | 010602         |
|                                                         |                                        | 7                        | Sodas                            | With sugar                                                | 1                         | 010701         |
|                                                         |                                        |                          |                                  | Without sugar                                             | 2                         | 010702         |
|                                                         |                                        |                          |                                  | Other                                                     | 3                         | 010703         |
|                                                         |                                        | 8                        | Powdered flavored beverages      | With sugar                                                | 1                         | 010801         |
|                                                         |                                        |                          |                                  | Without sugar                                             | 2                         | 010802         |
|                                                         |                                        | 9                        | Beverages-other                  | Other                                                     | 1                         | 010901         |
|                                                         |                                        | 1                        | Bread (only packaged)            | Packaged loaf of white bread normal                       | 1                         | 020101         |
|                                                         |                                        |                          |                                  | Packaged loaf of white bread light or diet                | 2                         | 020102         |
|                                                         |                                        |                          |                                  | Packaged loaf of white bread with grains                  | 3                         | 020103         |
|                                                         |                                        |                          |                                  | Packaged loaf of whole grain bread normal, light or diet. | 4                         | 020104         |
|                                                         |                                        |                          |                                  | Packaged hot dog buns                                     | 5                         | 020105         |
|                                                         |                                        |                          |                                  | Packaged hamburger buns                                   | 6                         | 020106         |
|                                                         |                                        |                          |                                  | Frozen white bread or dough                               | 7                         | 020107         |
|                                                         |                                        |                          |                                  | Easter bread (" <i>pan de pascua</i> ")                   | 8                         | 020108         |
|                                                         |                                        | 2                        | Dough and tortillas              | " <i>Sopaipillas</i> " (frozen)                           | 1                         | 020201         |
|                                                         |                                        | 3                        | Cookies/crackers                 | Cookies (with sugar)                                      | 1                         | 020301         |
|                                                         |                                        |                          |                                  | Cookies with filling                                      | 2                         | 020302         |
|                                                         |                                        |                          |                                  | Salty crackers                                            | 3                         | 020303         |
|                                                         |                                        |                          |                                  | Whole grain crackers                                      | 4                         | 020304         |
|                                                         |                                        |                          |                                  | Single large packaged cookies                             | 5                         | 020305         |
|                                                         |                                        |                          |                                  | Soda crackers                                             | 6                         | 020306         |
|                                                         |                                        | 4                        | Cakes, muffins and pastries      | <i>Afajores</i>                                           | 1                         | 020401         |
|                                                         |                                        |                          |                                  | <i>Cuchuflias</i>                                         | 2                         | 020402         |
|                                                         |                                        |                          |                                  | Biscuits                                                  | 3                         | 020403         |
|                                                         |                                        |                          |                                  | Cake                                                      | 4                         | 020404         |
|                                                         |                                        |                          |                                  | Brownie                                                   | 5                         | 020405         |
|                                                         |                                        |                          |                                  | Filled wafers                                             | 6                         | 020406         |
|                                                         |                                        |                          |                                  | Wafers without filling                                    | 7                         | 020407         |
|                                                         |                                        |                          |                                  | Muffins                                                   | 8                         | 020408         |
|                                                         |                                        |                          |                                  | Chilean pastries                                          | 9                         | 020409         |
|                                                         |                                        | 5                        | Breads and baked goods-other     | Other                                                     | 1                         | 020501         |
|                                                         |                                        | 1                        | Granola bars                     | Granola bars with fruit                                   | 1                         | 030101         |
|                                                         |                                        |                          |                                  | Granola bars with chocolate                               | 2                         | 030102         |

**Supplemental Table 1: Food categories and subcategories**

| First subcategory number                                   | First subcategory name                          | Second subcategory name                                            | Second subcategory number | Numerical code                                                           |   |        |
|------------------------------------------------------------|-------------------------------------------------|--------------------------------------------------------------------|---------------------------|--------------------------------------------------------------------------|---|--------|
| 2                                                          | Breakfast cereals                               | Granola bars with nuts                                             | 3                         | 030103                                                                   |   |        |
|                                                            |                                                 | Flakes                                                             | 1                         | 030201                                                                   |   |        |
|                                                            |                                                 | Stars                                                              | 2                         | 030202                                                                   |   |        |
|                                                            |                                                 | Balls                                                              | 3                         | 030203                                                                   |   |        |
|                                                            |                                                 | Puffed cereals                                                     | 4                         | 030204                                                                   |   |        |
|                                                            |                                                 | Baby cereals                                                       | 5                         | 030205                                                                   |   |        |
|                                                            |                                                 | Muesli                                                             | 6                         | 030206                                                                   |   |        |
|                                                            |                                                 | Granola                                                            | 7                         | 030207                                                                   |   |        |
|                                                            |                                                 | Oatmeal                                                            | 8                         | 030208                                                                   |   |        |
|                                                            |                                                 | Fiber                                                              | 9                         | 030209                                                                   |   |        |
| 3                                                          | Breakfast cereals and bars-other                | Other                                                              | 1                         | 030301                                                                   |   |        |
| 1                                                          | Chocolates and caramels                         | Hard caramels                                                      | 1                         | 040101                                                                   |   |        |
|                                                            |                                                 | Soft toffees                                                       | 2                         | 040102                                                                   |   |        |
|                                                            |                                                 | Chocolates                                                         | 3                         | 040103                                                                   |   |        |
|                                                            |                                                 | Bonbons                                                            | 4                         | 040104                                                                   |   |        |
|                                                            |                                                 | Chewy candies                                                      | 5                         | 040105                                                                   |   |        |
|                                                            |                                                 | Hard lollipops                                                     | 6                         | 040106                                                                   |   |        |
|                                                            |                                                 | Nuts covered in chocolate                                          | 7                         | 040107                                                                   |   |        |
|                                                            |                                                 | Gummy candies                                                      | 1                         | 040201                                                                   |   |        |
|                                                            |                                                 | Marshmallow candies                                                | 2                         | 040202                                                                   |   |        |
|                                                            |                                                 | 2                                                                  | Gelatin-based candies     | Gummy candies                                                            | 1 | 040201 |
| Marshmallow candies                                        | 2                                               |                                                                    |                           | 040202                                                                   |   |        |
| Gum                                                        | 1                                               |                                                                    |                           | 040301                                                                   |   |        |
| 3                                                          | Chewing gum                                     | Gum with filling                                                   | 2                         | 040302                                                                   |   |        |
|                                                            |                                                 | Hard candies filled with gum                                       | 3                         | 040303                                                                   |   |        |
|                                                            |                                                 | Sweets with " <i>manjar</i> " (Chilean caramel)                    |                           |                                                                          |   |        |
| 4                                                          | Sweets with " <i>manjar</i> " (Chilean caramel) | Bars of manjar                                                     | 1                         | 040401                                                                   |   |        |
|                                                            |                                                 | Balls of manjar                                                    | 2                         | 040402                                                                   |   |        |
|                                                            |                                                 | Lollipop of manjar                                                 | 3                         | 040403                                                                   |   |        |
|                                                            |                                                 | Other                                                              | 1                         | 040501                                                                   |   |        |
| 1                                                          | Soups                                           | Powdered soups (require preparation)                               | 1                         | 050101                                                                   |   |        |
|                                                            |                                                 | Soups for one or other types of instant soups (e.g. 'Cup of soup') | 2                         | 050102                                                                   |   |        |
|                                                            |                                                 | Powdered cream soups                                               | 3                         | 050103                                                                   |   |        |
|                                                            |                                                 | Vegetable bouillon                                                 | 4                         | 050104                                                                   |   |        |
|                                                            |                                                 | 2                                                                  | Instant foods             | Instant mashed potatoes                                                  | 1 | 050201 |
|                                                            |                                                 |                                                                    |                           | Instant pastas                                                           | 2 | 050202 |
|                                                            |                                                 |                                                                    |                           | Instant rice                                                             | 3 | 050203 |
|                                                            |                                                 | 3                                                                  | Ready-to-eat baby foods   | Canned/preserved legumes                                                 | 4 | 050204 |
|                                                            |                                                 |                                                                    |                           | Canned/preserved vegetables                                              | 5 | 050205 |
|                                                            |                                                 |                                                                    |                           | Pure baby food                                                           | 1 | 050301 |
| 4                                                          | Frozen foods                                    | Chopped/minced baby food                                           | 2                         | 050302                                                                   |   |        |
|                                                            |                                                 | Pizzas                                                             | 1                         | 050401                                                                   |   |        |
| 5                                                          | Ready-to-eat baby foods-other                   | Potatoes                                                           | 2                         | 050402                                                                   |   |        |
|                                                            |                                                 | Spring rolls                                                       | 3                         | 050403                                                                   |   |        |
|                                                            |                                                 | <i>Empanadas</i>                                                   | 4                         | 050404                                                                   |   |        |
|                                                            |                                                 | <i>Humitas</i>                                                     | 5                         | 050405                                                                   |   |        |
|                                                            |                                                 | Other frozen foods                                                 | 6                         | 050406                                                                   |   |        |
|                                                            |                                                 | Other                                                              | 1                         | 050501                                                                   |   |        |
|                                                            |                                                 | 1                                                                  | Processed meats           | Marinated or seasoned frozen meat products (chicken, pork, beef, turkey) | 1 | 060101 |
| Breaded frozen meat products (chicken, pork, beef, turkey) | 2                                               |                                                                    |                           | 060102                                                                   |   |        |

**Supplemental Table 1: Food categories and subcategories**

| First subcategory number | First subcategory name    | Second subcategory name                     | Second subcategory number | Numerical code |
|--------------------------|---------------------------|---------------------------------------------|---------------------------|----------------|
|                          |                           | Nugget (chicken or turkey)                  | 3                         | 060103         |
|                          |                           | Hamburgers (chicken, pork, beef, turkey)    | 4                         | 060104         |
|                          |                           | Sausages/hot-dogs                           | 5                         | 060105         |
| 2                        | Processed fish or seafood | Marinated frozen fish                       | 1                         | 070201         |
|                          |                           | Breaded/battered frozen fish                | 2                         | 070202         |
|                          |                           | Fish nuggets                                | 3                         | 070203         |
|                          |                           | Hamburgers made of fish                     | 4                         | 070204         |
|                          |                           | Breaded fish steaks                         | 5                         | 070205         |
|                          |                           | Canned seafood                              | 6                         | 070206         |
| 4                        | Fish and seafood-other    | Other                                       | 1                         | 070401         |
| 1                        | Cheeses                   | Normal fresh cheeses                        | 1                         | 080101         |
|                          |                           | Light fresh cheeses                         | 2                         | 080102         |
|                          |                           | Semi-hard cheeses                           | 3                         | 080103         |
|                          |                           | Cream cheeses and spreads                   | 4                         | 080104         |
|                          |                           | Shredded cheeses                            | 5                         | 080105         |
|                          |                           | Soft ("buttery") cheeses                    | 6                         | 080106         |
| 2                        | Yogurt                    | Normal yogurt                               | 1                         | 080201         |
|                          |                           | Yogurt light or diet                        | 2                         | 080202         |
|                          |                           | Normal yogurt with fruit and/or nuts        | 3                         | 080203         |
|                          |                           | Yogurt with fruit and/or nuts light or diet | 4                         | 080204         |
|                          |                           | Yogurt with sauce added                     | 5                         | 080205         |
|                          |                           | Yogurt with breakfast cereals added         | 6                         | 080206         |
|                          |                           | Liquid yogurt                               | 7                         | 080207         |
| 3                        | Dairy drinks              | Dairy drinks                                | 1                         | 080301         |
| 4                        | Milks                     | Liquid whole milk                           | 1                         | 080401         |
|                          |                           | Liquid two percent milk                     | 2                         | 080402         |
|                          |                           | Liquid skim milk                            | 3                         | 080403         |
|                          |                           | Flavored whole milk                         | 4                         | 080404         |
|                          |                           | Flavored two percent milk                   | 5                         | 080405         |
|                          |                           | Flavored skim milk                          | 6                         | 080406         |
|                          |                           | Condensed milk                              | 7                         | 080407         |
|                          |                           | Evaporated milk                             | 8                         | 080408         |
|                          |                           | Powdered whole milk                         | 9                         | 080409         |
|                          |                           | Powdered two percent milk                   | 10                        | 080410         |
|                          |                           | Powdered skim milk                          | 11                        | 080411         |
|                          |                           | Milk or formula for infants                 | 12                        | 080412         |
|                          |                           | Milk or formula for children (1-5 years)    | 13                        | 080413         |
|                          |                           | Flavored powdered to be mixed with milk     | 14                        | 080414         |
| 5                        | Creams                    | Whole milk cream                            | 1                         | 080501         |
|                          |                           | Cream light                                 | 2                         | 080502         |
|                          |                           | Thick cream                                 | 3                         | 080503         |
|                          |                           | Thick cream light                           | 4                         | 080504         |
|                          |                           | Fresh cream                                 | 5                         | 080505         |
|                          |                           | Fresh cream for whipping                    | 6                         | 080506         |
|                          |                           | Whipped cream                               | 7                         | 080507         |
|                          |                           | Pastry cream                                | 8                         | 080508         |
| 6                        | Desserts                  | Flan                                        | 1                         | 080601         |
|                          |                           | Semolina                                    | 2                         | 080602         |
|                          |                           | Caramelized milk                            | 3                         | 080603         |
|                          |                           | Rice pudding                                | 4                         | 080604         |
|                          |                           | Cold desserts (e.g. ready-to-eat puddings)  | 5                         | 080605         |

**Supplemental Table 1: Food categories and subcategories**

| First subcategory number | First subcategory name                       | Second subcategory name                          | Second subcategory number | Numerical code |
|--------------------------|----------------------------------------------|--------------------------------------------------|---------------------------|----------------|
|                          |                                              | Frozen cakes/tarts                               | 6                         | 080606         |
|                          |                                              | Frozen biscuits (e.g. ice-cream sandwiches)      | 7                         | 080607         |
|                          |                                              | Frozen desserts                                  | 8                         | 080608         |
| 7                        | Ice creams                                   | Milk-based ice cream                             | 1                         | 080701         |
|                          |                                              | Milk-based ice cream light                       | 2                         | 080702         |
|                          |                                              | Milk-based ice cream diet                        | 3                         | 080703         |
|                          |                                              | Ice cream bars                                   | 4                         | 080704         |
|                          |                                              | Frozen yogurt                                    | 5                         | 080705         |
| 8                        | Dairy products-other                         | Other                                            | 1                         | 080801         |
| 1                        | Fruit compotes and marmalades                | Marmalades (normal, light, sugar-free)           | 1                         | 090101         |
|                          |                                              | Dulce                                            | 2                         | 090102         |
|                          |                                              | Fruit compotes                                   | 3                         | 090103         |
|                          |                                              | Jell-O                                           | 4                         | 090104         |
| 2                        | Preserved fruit                              | Preserved fruit with sugar                       | 1                         | 090201         |
|                          |                                              | Preserved fruit without sugar                    | 2                         | 090202         |
| 3                        | Dried fruits                                 | Fruit/vegetable chips                            | 1                         | 090301         |
| 4                        | Canned/preserved fruits and vegetables-other | Other                                            | 1                         | 090401         |
| 1                        | Sauces                                       | Tomato sauce                                     | 1                         | 100101         |
|                          |                                              | Mayonnaise                                       | 2                         | 100102         |
|                          |                                              | Ketchup                                          | 3                         | 100103         |
| 2                        | Spreads                                      | <i>Manjar</i>                                    | 1                         | 100201         |
|                          |                                              | <i>Manjar</i> light                              | 2                         | 100202         |
|                          |                                              | Cocoa cream spreads (e.g. <i>Nutella</i> )       | 3                         | 100203         |
|                          |                                              | Butter                                           | 4                         | 100204         |
|                          |                                              | Margarine                                        | 5                         | 100205         |
|                          |                                              | Light Margarine                                  | 6                         | 100206         |
|                          |                                              | Cow milk-based caramel ( <i>dulce de leche</i> ) | 7                         | 100207         |
|                          |                                              | Honey                                            | 8                         | 100208         |
|                          |                                              | Palm syrup                                       | 9                         | 100209         |
|                          |                                              | Icing                                            | 10                        | 100210         |
|                          |                                              | Peanut butter                                    | 11                        | 100211         |
| 3                        | Sauces and spreads-other                     | Other                                            | 1                         | 100301         |
| 1                        | Potato chips                                 |                                                  | 1                         | 110101         |
| 2                        | Potato shoestrings                           |                                                  | 1                         | 110201         |
| 3                        | Nuts                                         |                                                  | 1                         | 110301         |
| 4                        | Sweet or salty puffed snacks                 |                                                  | 1                         | 110401         |
| 5                        | Baked corn snacks                            |                                                  | 1                         | 110501         |
| 6                        | Popcorn                                      |                                                  | 1                         | 110601         |
| 7                        | Tortilla / corn-based chips                  |                                                  | 1                         | 110701         |
| 8                        | Snack foods-other                            |                                                  | 1                         | 110801         |
